# Supplementary material for: STAT3 Targets Suggest Mechanisms of Aggressive Tumorigenesis in Diffuse Large B-Cell Lymphoma
Source: PubMed Central journal article supplement (PMC3852380; doi:10.1534/g3.113.007674), 2013-10-18
Supplement: supp_g3.113.007674_TableS2.pdf [file supp_g3.113.007674_TableS2.pdf]

**Table S2 RNA-Seq sequencing statistics for all replicates**

| <b>Cell line</b>   | <b>Replicate</b> | <b>Total reads</b> | <b>Mapped reads</b> | <b>Percent mapping</b> |
|--------------------|------------------|--------------------|---------------------|------------------------|
| <b>ABC subtype</b> |                  |                    |                     |                        |
| SU-DHL2            | 1                | 28,204,354         | 24,615,267          | 87.27%                 |
|                    | 2                | 25,329,137         | 21,547,373          | 85.07%                 |
| OCI-Ly3            | 1                | 30,939,496         | 24,755,240          | 80.01%                 |
|                    | 2                | 28,502,235         | 21,678,611          | 76.06%                 |
| OCI-Ly10           | 1                | 32,056,465         | 28,628,279          | 89.31%                 |
|                    | 2                | 29,305,171         | 26,100,549          | 89.06%                 |
| U-2932             | 1                | 17,600,699         | 14,810,651          | 84.15%                 |
|                    | 2                | 15,868,465         | 13,051,886          | 82.25%                 |
| <b>GCB subtype</b> |                  |                    |                     |                        |
| SU-DHL4            | 1                | 18,071,332         | 15,607,255          | 86.36%                 |
|                    | 2                | 18,930,836         | 16,772,051          | 88.60%                 |
| SU-DHL6            | 1                | 29,374,231         | 24,974,330          | 85.02%                 |
|                    | 2                | 33,740,415         | 28,752,594          | 85.22%                 |
| SU-DHL10           | 1                | 27,520,478         | 24,673,323          | 89.65%                 |
|                    | 2                | 28,931,874         | 25,673,326          | 88.74%                 |
| OCI-Ly7            | 1                | 26,992,682         | 23,664,656          | 87.67%                 |
|                    | 2                | 27,520,987         | 24,460,363          | 88.88%                 |
